# Supplementary material for: Kcnj16 (Kir5.1) Gene Ablation Causes Subfertility and Increases the Prevalence of Morphologically Abnormal Spermatozoa
Source: Int J Mol Sci. 2021 Jun 1;22(11):5972. doi: 10.3390/ijms22115972 (PMC8199489; doi:10.3390/ijms22115972)
Supplement: Supplementary file 1 [file ijms-22-05972-s001.zip › ijms-1218231-supplementary.pdf]

## ***Kcnj16* (*Kir5.1*) Gene Ablation Causes Subfertility and Increases the Prevalence of Morphologically Abnormal Spermatozoa**

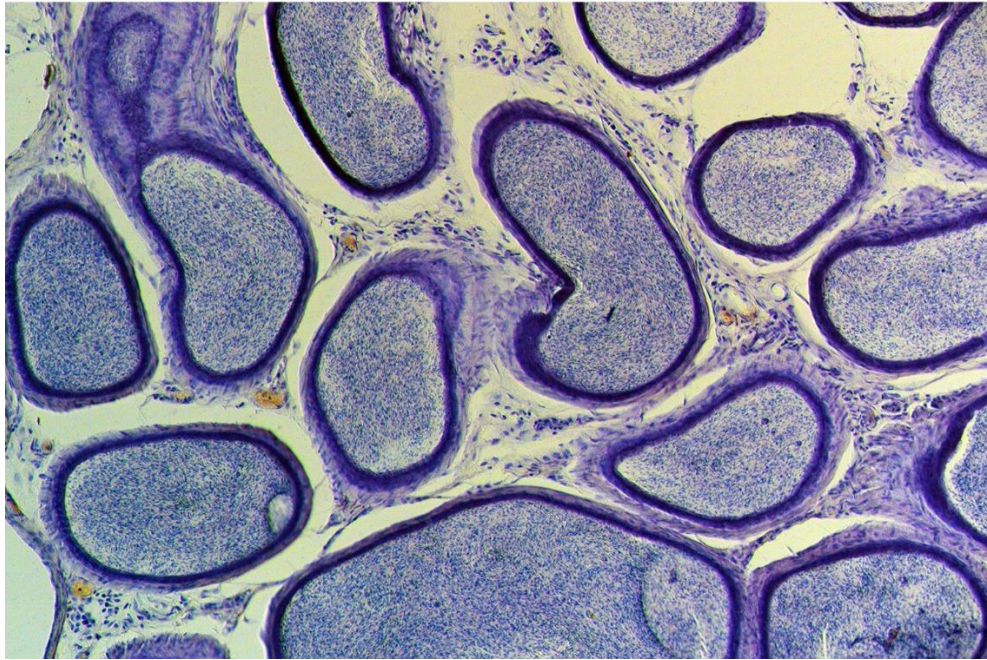

**Figure S1.** Hematoxylin and eosin staining of cauda epididymis. Sample image showing the typical histological structures of epididymis collected from a WT mouse, as well as the numerous spermatozoa located in the lumen.
